# Supplementary material for: Intra-Species Interactions in Streptococcus pneumoniae Biofilms
Source: PubMed Central journal article supplement (PMC8767070; doi:10.3389/fcimb.2021.803286), 2022-01-05
Supplement: DataSheet_1.pdf [file DataSheet_1.pdf]

**SUPPLEMENTARY MATERIAL - TABLES**

**Table S1. Composition of modified chemically defined medium (mCDM)**

| Component                                                                                                                                                                                                                                           | Concentration<br>(mg L <sup>-1</sup> ) |
|-----------------------------------------------------------------------------------------------------------------------------------------------------------------------------------------------------------------------------------------------------|----------------------------------------|
| <b>Phosphate buffer</b>                                                                                                                                                                                                                             |                                        |
| K <sub>2</sub> HPO <sub>4</sub>                                                                                                                                                                                                                     | 200                                    |
| KH <sub>2</sub> PO <sub>4</sub>                                                                                                                                                                                                                     | 1000                                   |
| NaH <sub>2</sub> PO <sub>4</sub> ·H <sub>2</sub> O                                                                                                                                                                                                  | 3200                                   |
| Na <sub>2</sub> HPO <sub>4</sub> ·2H <sub>2</sub> O                                                                                                                                                                                                 | 6936                                   |
| <b>Metals</b>                                                                                                                                                                                                                                       |                                        |
| MnSO <sub>4</sub>                                                                                                                                                                                                                                   | 5                                      |
| MgSO <sub>4</sub> ·7H <sub>2</sub> O                                                                                                                                                                                                                | 700                                    |
| CaCl <sub>2</sub>                                                                                                                                                                                                                                   | 5.1                                    |
| Fe(NO <sub>3</sub> ) <sub>3</sub> ·9H <sub>2</sub> O                                                                                                                                                                                                | 1                                      |
| Fe SO <sub>4</sub> ·7H <sub>2</sub> O                                                                                                                                                                                                               | 5                                      |
| <b>Bases</b>                                                                                                                                                                                                                                        |                                        |
| Adenine                                                                                                                                                                                                                                             | 20                                     |
| Guanine hydrochloride                                                                                                                                                                                                                               | 20                                     |
| Uracil                                                                                                                                                                                                                                              | 20                                     |
| <b>Vitamins</b>                                                                                                                                                                                                                                     |                                        |
| p-Amonibenzoic acid                                                                                                                                                                                                                                 | 0.2                                    |
| Biotin                                                                                                                                                                                                                                              | 0.2                                    |
| Folic Acid                                                                                                                                                                                                                                          | 0.8                                    |
| Niacinamide                                                                                                                                                                                                                                         | 1                                      |
| β-Nicotinamide adenine nucleotide                                                                                                                                                                                                                   | 2.5                                    |
| Pantothenate calcium salt                                                                                                                                                                                                                           | 2                                      |
| Pyridoxal                                                                                                                                                                                                                                           | 1                                      |
| Pyridoxamine dihydrochloride                                                                                                                                                                                                                        | 1                                      |
| Riboflavin                                                                                                                                                                                                                                          | 2                                      |
| Thiamine hydrochloride                                                                                                                                                                                                                              | 1                                      |
| Vitamin B <sub>12</sub>                                                                                                                                                                                                                             | 0.1                                    |
| <b>Amino acids</b>                                                                                                                                                                                                                                  |                                        |
| DL-Alanine, L-Arginine, L-Aspartic acid, L-Asparagine,<br>L-Glutamic acid, Glycine, L-Histidine, L-Isoleucine, L-Leucine,<br>L-Lysine, L-Methionine, L-Phenylalanine, L-Proline,<br>Hydroxy-L-proline, L-Serine, L-Tryptophan, L-Tyrosine, L-Valine | 100 of each                            |
| L-Cystine                                                                                                                                                                                                                                           | 50                                     |
| L-Glutamine, L-Threonine                                                                                                                                                                                                                            | 200 of each                            |
| <b>NaHCO<sub>3</sub></b>                                                                                                                                                                                                                            | 2500                                   |
| <b>NaC<sub>2</sub>H<sub>3</sub>O<sub>2</sub></b>                                                                                                                                                                                                    | 2714                                   |
| <b>Cysteine HCl<sup>a</sup></b>                                                                                                                                                                                                                     | 800                                    |
| <b>Choline chloride<sup>a</sup></b>                                                                                                                                                                                                                 | 1000                                   |
| <b>Galactose<sup>a</sup></b>                                                                                                                                                                                                                        | 10000                                  |

mCDM is a modified version of the CDM proposed by Van de Rijn and Kessler (van de Rijn and Kessler, 1980). The differences are: cysteine-HCl is at higher concentration in the current version (800mg mL<sup>-1</sup> instead of 500mg mL<sup>-1</sup>), choline chloride was absent in the original recipe, and glucose was replaced by galactose at the same concentration.

**Table S2. Fluorescent variants of the bacterial strains selected for the study of intra-species interactions.**

| Strain                      | Relevant characteristics <sup>c</sup>         | Reference  |
|-----------------------------|-----------------------------------------------|------------|
| D39_GFP                     | D39 <i>hlpA-gfp_Cam<sup>r</sup></i>           | This study |
| D39_RFP                     | D39 <i>hlpA_hlpA-rfp_Cam<sup>r</sup></i>      | This study |
| TIGR4_GFP                   | TIGR4 <i>hlpA-gfp_Cam<sup>r</sup></i>         | This study |
| TIGR4_RFP                   | TIGR4 <i>hlpA_hlpA-rfp_Cam<sup>r</sup></i>    | This study |
| 2099-3_GFP <sup>a</sup>     | 2099-3 <i>hlpA-gfp_Cam<sup>r</sup></i>        | This study |
| 2099-3_RFP <sup>a</sup>     | 2099-3 <i>hlpA_hlpA-rfp_Cam<sup>r</sup></i>   | This study |
| 7632-15A_GFP                | 7632-15A <i>hlpA-gfp_Cam<sup>r</sup></i>      | This study |
| 7632-15A_RFP                | 7632-15A <i>hlpA_hlpA-rfp_Cam<sup>r</sup></i> | This study |
| 5262.1-19A_GFP <sup>b</sup> | 5902-19A <i>hlpA-gfp_Cam<sup>r</sup></i>      | This study |
| 5262.1-19A_RFP <sup>b</sup> | 5902-19A <i>hlpA_hlpA-rfp_Cam<sup>r</sup></i> | This study |
| 5902-19A_GFP <sup>a</sup>   | 5902-19A <i>hlpA-gfp_Cam<sup>r</sup></i>      | This study |
| 5902-19A_RFP <sup>a</sup>   | 5902-19A <i>hlpA_hlpA-rfp_Cam<sup>r</sup></i> | This study |
| 1990-19F_GFP                | 1990-19F <i>hlpA-gfp_Cam<sup>r</sup></i>      | This study |
| 1990-19F_RFP                | 1990-19F <i>hlpA_hlpA-rfp_Cam<sup>r</sup></i> | This study |
| 5756-22F_GFP                | 5756-22F <i>hlpA-gfp_Cam<sup>r</sup></i>      | This study |
| 5756-22F_RFP                | 5756-22F <i>hlpA_hlpA-rfp_Cam<sup>r</sup></i> | This study |
| 8046-22F_GFP <sup>a</sup>   | 8046-22F <i>hlpA-gfp_Cam<sup>r</sup></i>      | This study |
| 8046-22F_RFP <sup>a</sup>   | 8046-22F <i>hlpA_hlpA-rfp_Cam<sup>r</sup></i> | This study |
| 8276-33F_GFP <sup>b</sup>   | 8276-33F <i>hlpA-gfp_Cam<sup>r</sup></i>      | This study |
| 8276-33F_RFP <sup>b</sup>   | 8276-33F <i>hlpA_hlpA-rfp_Cam<sup>r</sup></i> | This study |
| 5262.2-NT_GFP <sup>a</sup>  | 5262-NT <i>hlpA-gfp_Cam<sup>r</sup></i>       | This study |
| 5262.2-NT_RFP <sup>a</sup>  | 5262-NT <i>hlpA_hlpA-rfp_Cam<sup>r</sup></i>  | This study |
| 5435-NT_GFP                 | 5435-NT <i>hlpA-gfp_Cam<sup>r</sup></i>       | This study |
| 5435-NT_RFP                 | 5435-NT <i>hlpA_hlpA-rfp_Cam<sup>r</sup></i>  | This study |
| 7031-NT_GFP                 | 7031-NT <i>hlpA-gfp_Cam<sup>r</sup></i>       | This study |
| 7031-NT_RFP                 | 7031-NT <i>hlpA_hlpA-rfp_Cam<sup>r</sup></i>  | This study |
| 6209-NT_GFP                 | 6209-NT <i>hlpA-gfp_Cam<sup>r</sup></i>       | This study |
| 6209-NT_RFP                 | 6209-NT <i>hlpA_hlpA-rfp_Cam<sup>r</sup></i>  | This study |

GFP: green fluorescent protein; RFP: red fluorescent protein; HlpA: histone-like protein A; NT: non-typeable (non-encapsulated).

<sup>a</sup>Excluded from the study due to significant differences in cell viability in biofilm between wild type and at least one of the fluorescently labelled variants.

<sup>b</sup>Excluded from the study due to high heterogeneity of the GFP-labelled variant

<sup>c</sup>In the genotype of fluorescently labelled strains the hyphen (-) and the underscore (\_) indicate a translational and a transcriptional fusion, respectively. Cam<sup>r</sup> indicates chloramphenicol resistance (Kjos et al., 2015).

**Table S3. Biofilm depth of representative strains in single and dual-strain biofilms**

| Interaction  | Strain variant tested in single biofilm | Biofilm depth in single biofilm ( $\mu\text{m}$ ) | Strain variants tested in dual biofilm | Biofilm depth in dual biofilm ( $\mu\text{m}$ ) |
|--------------|-----------------------------------------|---------------------------------------------------|----------------------------------------|-------------------------------------------------|
| Commensalism | 5435-NT-GFP                             | 8.10                                              | 5435-NT-GFP and 7632-15A RFP           | 21.77                                           |
|              | 7632-15A-RFP                            | 16.13                                             |                                        |                                                 |
|              | 5435-NT-RFP                             | 7.26                                              | 5435-NT-RFP and 7632-15A GFP           | 16.94                                           |
|              | 7632-15A-GFP                            | 14.52                                             |                                        |                                                 |
| Competition  | 7031-NT-GFP                             | 15.32                                             | 7031-NT-GFP and TIGR4-RFP              | 12.15                                           |
|              | TIGR4-RFP                               | 17.01                                             |                                        |                                                 |
|              | 7031-NT-RFP                             | 21.06                                             | 7031-NT-RFP and TIGR4-GFP              | 10.53                                           |
|              | TIGR4-GFP                               | 12.96                                             |                                        |                                                 |
| Amensalism   | 1990-19F-GFP                            | 12.10                                             | 1990-19F-GFP and 7031-NT-RFP           | 21.77                                           |
|              | 7031-NT-RFP                             | 21.06                                             |                                        |                                                 |
|              | 1990-19F-RFP                            | 8.06                                              | 1990-19F-RFP and 7031-NT-GFP           | 16.94                                           |
|              | 7031-NT-GFP                             | 15.32                                             |                                        |                                                 |

Single and dual-strain biofilms were grown in 24-well microscope slides suitable for confocal microscopy (IBIDI, Germany) for 72h, as described. For each biofilm,  $10^5$  cells were inoculated per well - dual-strain biofilms were inoculated in a 1:1 ratio, in a total of  $10^5$  cells. In each experiment two strains were tested: one labelled with GFP and one with labelled with RFP. As a control, each pair of strains was tested with reverse fluorescent labels. For comparative analysis single-strain biofilms of the same strains were done in parallel. Measurements were obtained from a biofilm representative of each type of interaction and correspond to total biofilm depth, both in single and dual-strain biofilms. Z-sections were acquired at 0.81  $\mu\text{m}$  intervals on a Zeiss LSM 880 point scanning confocal microscope using the Airyscan detector, a 20x plan-apochromat 0.8 NA objective (Zeiss) and the 488 nm and 561 nm laser lines. The Zeiss Zen 3.0 (black edition) software was used to control the microscope, adjust spectral detection for the emission of GFP and RFP and for processing of the Airyscan raw images.

## REFERENCES

- Kjos, M., Aprianto, R., Fernandes, V.E., Andrew, P.W., Van Strijp, J.A., Nijland, R., and Veening, J.W. (2015). Bright fluorescent *Streptococcus pneumoniae* for live-cell imaging of host-pathogen interactions. *J Bacteriol* 197, 807-818.
- Van De Rijn, I., and Kessler, R.E. (1980). Growth characteristics of group A streptococci in a new chemically defined medium. *Infect Immun* 27, 444-448.
